# Supplementary material for: Use of extended HR-HPV Genotyping in improving the Triage Strategy of 2019 ASCCP recommendations in Women with positive HR-HPV diagnosis and Simultaneous LSIL Cytology Results
Source: PubMed Central journal article supplement (PMC8176432; doi:10.7150/jca.55826), 2021-05-19
Supplement: jcav12p4332s1.pdf [file jcav12p4332s1.pdf]

**Table S1. Positivity rate of HR-HPV genotypes among 902 women with positive HR-HPV and LSIL cytology**

| Variates <sup>a</sup>             | Positive, n (%) | Negative, n (%) |
|-----------------------------------|-----------------|-----------------|
| HR-HPV                            |                 |                 |
| HPV16                             | 190(21.1%)      | 712(78.9%)      |
| HPV18                             | 81(9.0%)        | 821(91.0%)      |
| HPV31                             | 57(6.3%)        | 845(93.7%)      |
| HPV33                             | 70(7.8%)        | 832(92.2%)      |
| HPV35                             | 30(3.3%)        | 872(96.7%)      |
| HPV39                             | 41(4.5%)        | 861(95.5%)      |
| HPV45                             | 15(1.7%)        | 887(98.3%)      |
| HPV51                             | 121(13.4%)      | 781(86.6%)      |
| HPV52                             | 225(24.9%)      | 677(75.1%)      |
| HPV56                             | 99(11.0%)       | 803(89.0%)      |
| HPV58                             | 181(20.1%)      | 721(79.9%)      |
| HPV59                             | 33(3.7%)        | 869(96.3%)      |
| HPV66                             | 71(7.9%)        | 831(92.1%)      |
| HPV68                             | 64(7.1%)        | 838(92.9%)      |
| HR-HPV genotyping models          |                 |                 |
| HPV16/18 <sup>b</sup>             | 262(29.0%)      | 640(71.0%)      |
| HPV16/18/58 <sup>c</sup>          | 419(46.5%)      | 483(53.5%)      |
| HPV16/18/52/58 <sup>d</sup>       | 590(65.4%)      | 312(34.6%)      |
| HPV16/18/33/52/58 <sup>e</sup>    | 637(70.6%)      | 265(29.4%)      |
| HPV16/18/31/33/52/58 <sup>f</sup> | 674(74.7%)      | 228(25.3%)      |

**Note:** <sup>a</sup>: Only consider the prevalence of HR-HPV; <sup>b</sup>: Women with any infection of HPV-16, -18; <sup>c</sup>: Women with any infection of HPV-16, -18, -58; <sup>d</sup>: Women with any infection of HPV-16, -18, -52, -58; <sup>e</sup>: Women with any infection of HPV-16, -18, -33, -52, -58; <sup>f</sup>: Women with any infection of HPV-16, -18, -31, -33, -52, -58.

**Abbreviations:** LSIL, low-grade squamous intraepithelial lesion; HR-HPV, high-risk human papillomavirus

**Table S2. Prevalence of HR-HPV genotypes based on the histological diagnosis of 902 women with positive HR-HPV and LSIL cytology**

| Variates <sup>a</sup>             | Histological diagnosis     |                      | p-value |
|-----------------------------------|----------------------------|----------------------|---------|
|                                   | Normal/CIN1<br>N=676, n(%) | CIN2+<br>N=226, n(%) |         |
| HR-HPV                            |                            |                      |         |
| HPV16                             | 90(13.3%)                  | 100(44.2%)           | <0.001  |
| HPV18                             | 50(7.4%)                   | 31(13.7%)            | 0.004   |
| HPV31                             | 44(6.5%)                   | 13(5.8%)             | 0.686   |
| HPV33                             | 52(7.7%)                   | 18(8.0%)             | 0.895   |
| HPV35                             | 23(3.4%)                   | 7(3.1%)              | 0.049   |
| HPV39                             | 39(5.8%)                   | 2(0.9%)              | 0.001   |
| HPV45                             | 12(1.8%)                   | 3(1.3%)              | 0.773   |
| HPV51                             | 109(16.1%)                 | 12(5.3%)             | <0.001  |
| HPV52                             | 185(27.4%)                 | 40(17.7%)            | 0.004   |
| HPV56                             | 91(13.5%)                  | 8(3.5%)              | <0.001  |
| HPV58                             | 133(19.7%)                 | 48(21.2%)            | 0.611   |
| HPV59                             | 27(4.0%)                   | 6(2.7%)              | 0.353   |
| HPV66                             | 61(9.0%)                   | 10(4.4%)             | 0.026   |
| HPV68                             | 53(7.8%)                   | 11(4.9%)             | 0.132   |
| HR-HPV genotyping models          |                            |                      |         |
| HPV16/18 <sup>b</sup>             | 138(20.4%)                 | 124(54.9%)           | <0.001  |
| HPV16/18/58 <sup>c</sup>          | 259(38.3%)                 | 160(70.8%)           | <0.001  |
| HPV16/18/52/58 <sup>d</sup>       | 400(59.2%)                 | 190(84.1%)           | <0.001  |
| HPV16/18/33/52/58 <sup>e</sup>    | 435(64.3%)                 | 202(89.4%)           | <0.001  |
| HPV16/18/31/33/52/58 <sup>f</sup> | 464(68.6%)                 | 210(92.9%)           | <0.001  |

**Note:** <sup>a</sup>: Only consider the prevalence of HR-HPV; <sup>b</sup>: Women with any infection of HPV-16, -18; <sup>c</sup>: Women with any infection of HPV-16, -18, -58; <sup>d</sup>: Women with any infection of HPV-16, -18, -52, -58; <sup>e</sup>: Women with any infection of HPV-16, -18, -33, -52, -58; <sup>f</sup>: Women with any infection of HPV-16, -18, -31, -33, -52, -58.

**Abbreviations:** HR-HPV, high-risk human papillomavirus; CIN, cervical intraepithelial neoplasia; CIN2+, cervical intraepithelial neoplasia grade 2 or worse; LSIL, low-grade squamous intraepithelial lesion.
